# Supplementary material for: Effect of slight structural changes on the gelation properties of N-phenylstearamide supramolecular gels
Source: Royal Society of Chemistry journal article supplement (doi:10.1039/c8sm00961a), 2018-01-01
Supplement: c8sm00961a1.pdf [file c8sm00961a1.pdf]

## SUPPLEMENTARY INFORMATION

### Effect of Slight Structural Changes on Gelation Properties of *N*-phenylstearamide Supramolecular Gels

Alexandre R. Meyer,<sup>a</sup> Caroline R. Bender,<sup>a</sup> Daniel M. dos Santos,<sup>a</sup> Francieli I. Ziembowicz,<sup>b</sup> Clarissa P. Frizzo,<sup>a</sup> Marcos A. Villetti,<sup>b</sup> José M. Reichert,<sup>c</sup> Nilo Zanatta,<sup>a</sup> Helio G. Bonacorso<sup>a</sup> and Marcos A. P. Martins<sup>a\*</sup>

<sup>a</sup>Núcleo de Química de Heterociclos (NUQUIMHE), Department of Chemistry, Federal University of Santa Maria,  
<sup>b</sup>Laboratório de Espectroscopia e Polímeros (LEPOL), Department of Physics,  
<sup>c</sup>Laboratório de Física do Solo, Soil Department, Federal University of Santa Maria, 97105-900, Santa Maria, RS, Brazil

\*e-mail: [marcos.nuquimhe@gmail.com](mailto:marcos.nuquimhe@gmail.com)

#### Synthesis and spectral data of *N*-phenylstearamide

Stearic acid (0.34 g, 1.2 mmol), *N,N'*-Dicyclohexylcarbodiimide (0.25 g, 1.2 mmol) and 4-Dimethylaminopyridine (0.03 g, 0.25 mmol) were dissolved in dried dichloromethane (30 mL) in a round-bottom flask, equipped with a stir bar. After 30 min, the aromatic amine (1 mmol) was slowly added. The reaction mixture was stirred at 25 °C for 48 h. Afterwards, the dichloromethane was evaporated under reduced pressure. The solid obtained was recrystallized twice in ethanol furnishing the *N*-Phenylstearamides.

For characterization data, <sup>1</sup>H and <sup>13</sup>C NMR spectra, recorded on a Bruker Avance III (<sup>1</sup>H at 600.13 MHz and <sup>13</sup>C at 150.903 MHz; BRUKER BioSpinGmbH, Germany) in CDCl<sub>3</sub>/TMS solutions. Electrospray ionization mass spectra (ESI-MS) was performed in an Agilent Model 6460 Triple quadrupole 6460 (LC/MS-MS; Agilent Technologies, USA) operating in the positive-ion mode. The melting points were measured using a MDSC Q2000 (T-zero TM DSC technology, TA Instruments Inc., New Castle, DE, USA). The solid samples were subjected to three cycles of heating and cooling in the temperature range of 25 °C to 200 °C (at a heating rate of 5 °C min<sup>-1</sup>).

*N*-phenylstearamide. Yield 56%, m.p. 86.8 °C. <sup>1</sup>H-NMR (600.13 MHz, CDCl<sub>3</sub>, δ): 0.88 (t, 3H), 1.26 (s, 28H), 1.69-1.74 (m, 2H), 2.34 (t, 2H), 7.09 (t, 1H), 7.15 (s, 1H), 7.30 (t, 2H), 7.49 (d, 2H). <sup>13</sup>C-NMR (150.903 MHz, CDCl<sub>3</sub>, δ): 14.1, 22.7, 25.7, 29.3, 29.4, 29.5, 29.6, 29.7, 32.0, 37.9, 119.9, 124.2, 129.0, 138.0, 171.2; Positive ESI-MS *m/z* 360 [M + H]<sup>+</sup>.

*N*-(4-tolyl)stearamide. Yield 64% m.p. 91.6 °C. <sup>1</sup>H-NMR (600.13 MHz, CDCl<sub>3</sub>, δ): 0.88 (t, 3H), 1.25 (s, 28H), 1.70-1.72 (m, 2H), 2.30 (s, 3H), 2.33(t, 2H), 7.10 (d, 2H), 7.37

(d,2H).  $^{13}\text{C}$ -NMR (150.903 MHz,  $\text{CDCl}_3$ ,  $\delta$ ; ppm): 14.1, 20.1, 22.7, 25.7, 29.3, 29.4, 29.5, 29.6, 29.7, 32.0, 37.8, 120.0, 129.5, 133.9, 135.4, 171.5; Positive ESI-MS  $m/z$  374  $[\text{M} + \text{H}]^+$ .

*N*-(4-acetylphenyl)stearamide. Yield 69% m.p. 108.4 °C.  $^1\text{H}$ -NMR (600.13 MHz,  $\text{CDCl}_3$ ,  $\delta$ ): 0.88 (t, 3H), 1.26 (s, 28H), 1.69-1.77 (m, 2H), 2.37(t, 2H), 2.54 (s, 3H), 7.36 (s, 1H), 7.60 (d, 2H), 7.91 (d,2H).  $^{13}\text{C}$ -NMR (150.903 MHz,  $\text{CDCl}_3$ ,  $\delta$ ): 14.1, 22.8, 25.6, 26.4, 29.4, 29.5, 29.6, 29.7, 29.8, 32.1, 38.1, 119.2, 130.9, 133.3, 142.6, 171.7, 190.8; Positive ESI-MS  $m/z$  402  $[\text{M} + \text{H}]^+$ .

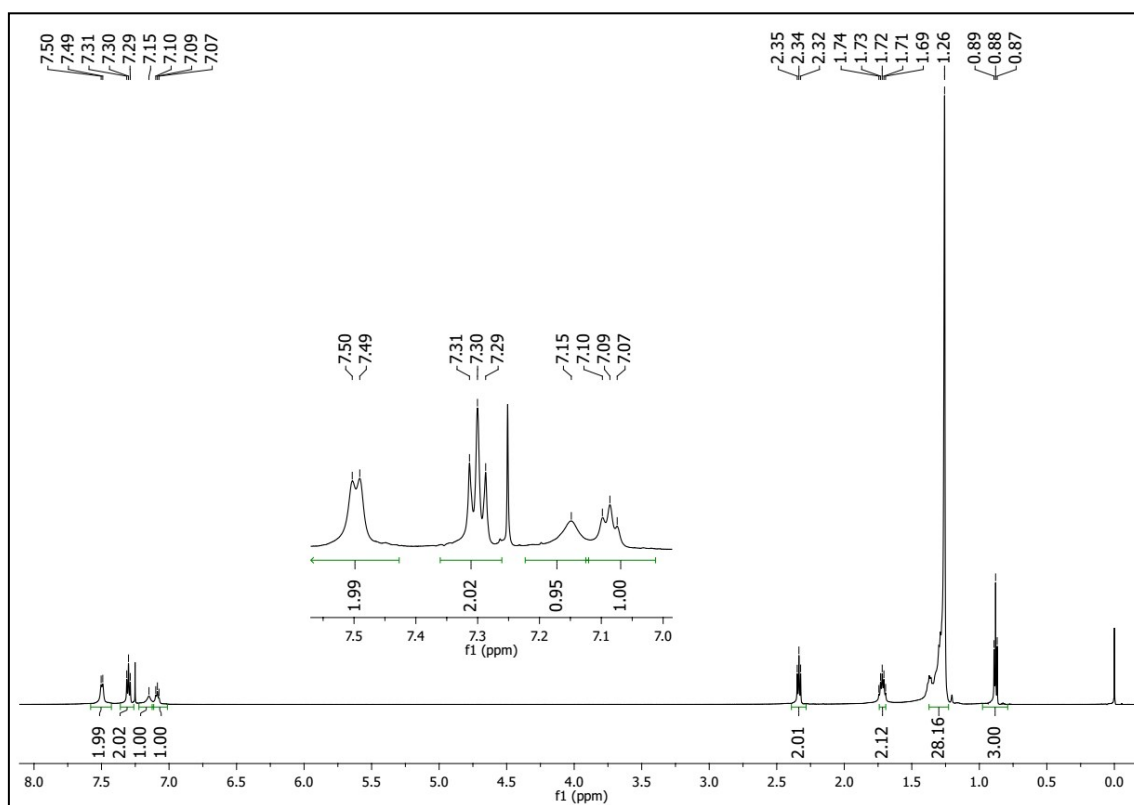

**Figure S1.**  $^1\text{H}$  RMN spectra of compound 1 in  $\text{CDCl}_3$ , 600.13 MHz (40°C).

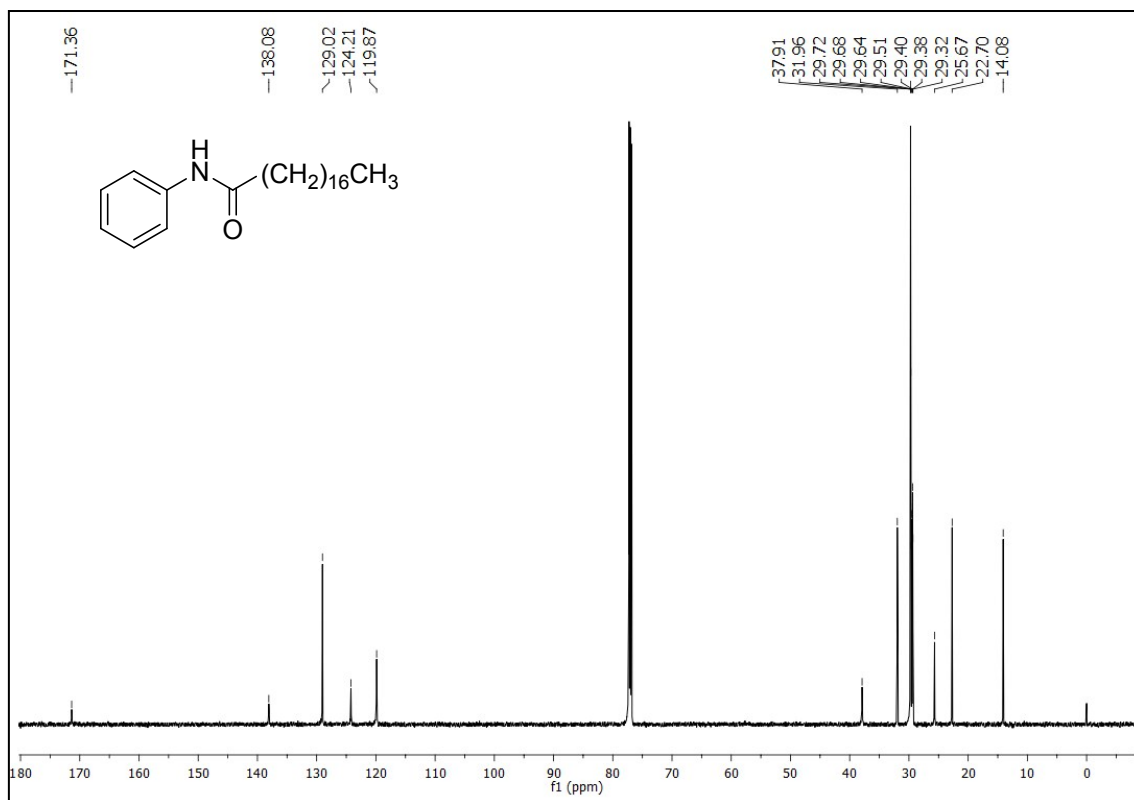

**Figure S2.** <sup>13</sup>C RMN spectra of compound **1** in CDCl<sub>3</sub>, 150.903 MHz (40°C).

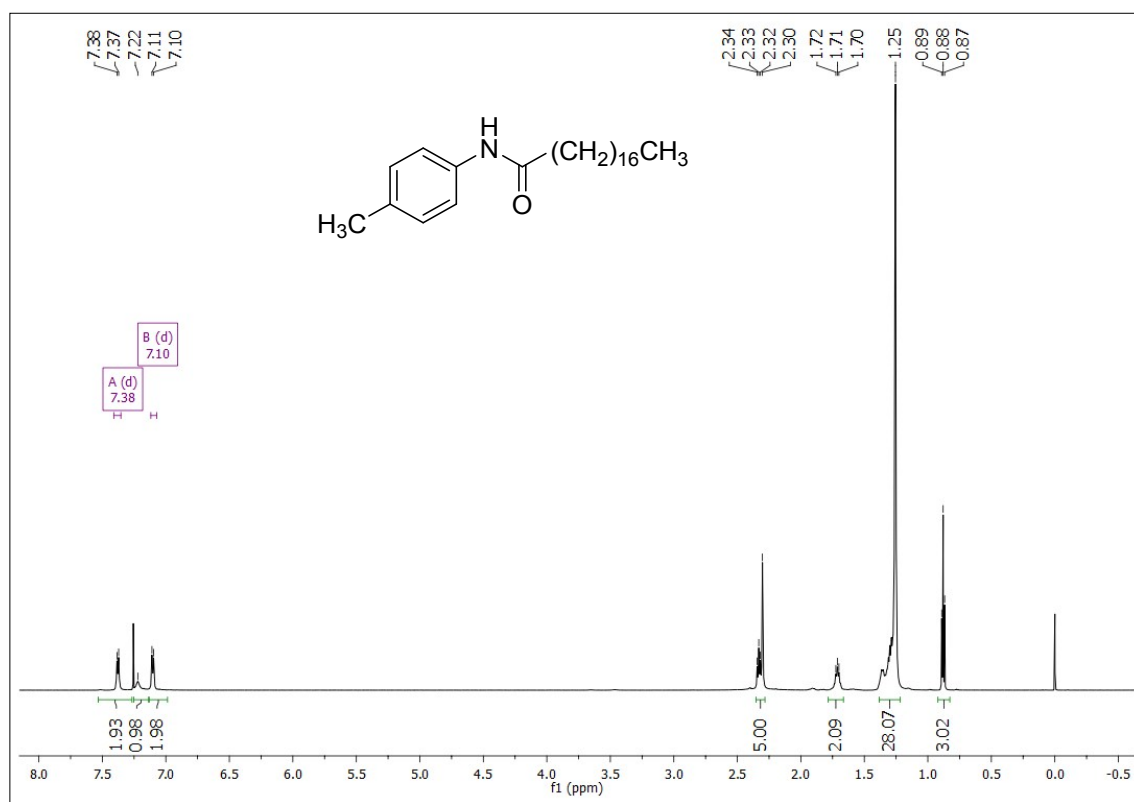

**Figure S3.** <sup>1</sup>H RMN spectra of compound **2** in CDCl<sub>3</sub>, 600.13 MHz (40°C).

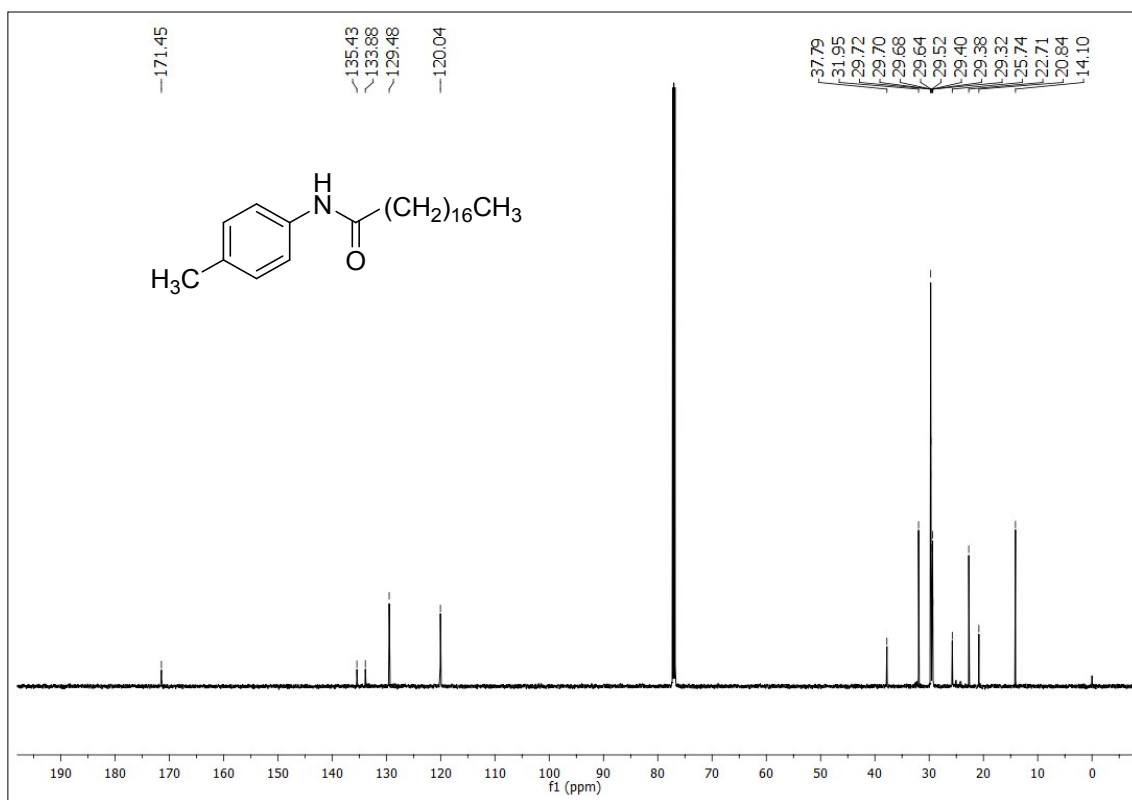

**Figure S4.** <sup>13</sup>C RMN spectra of compound **2** in CDCl<sub>3</sub>, 150.903 MHz (40°C).

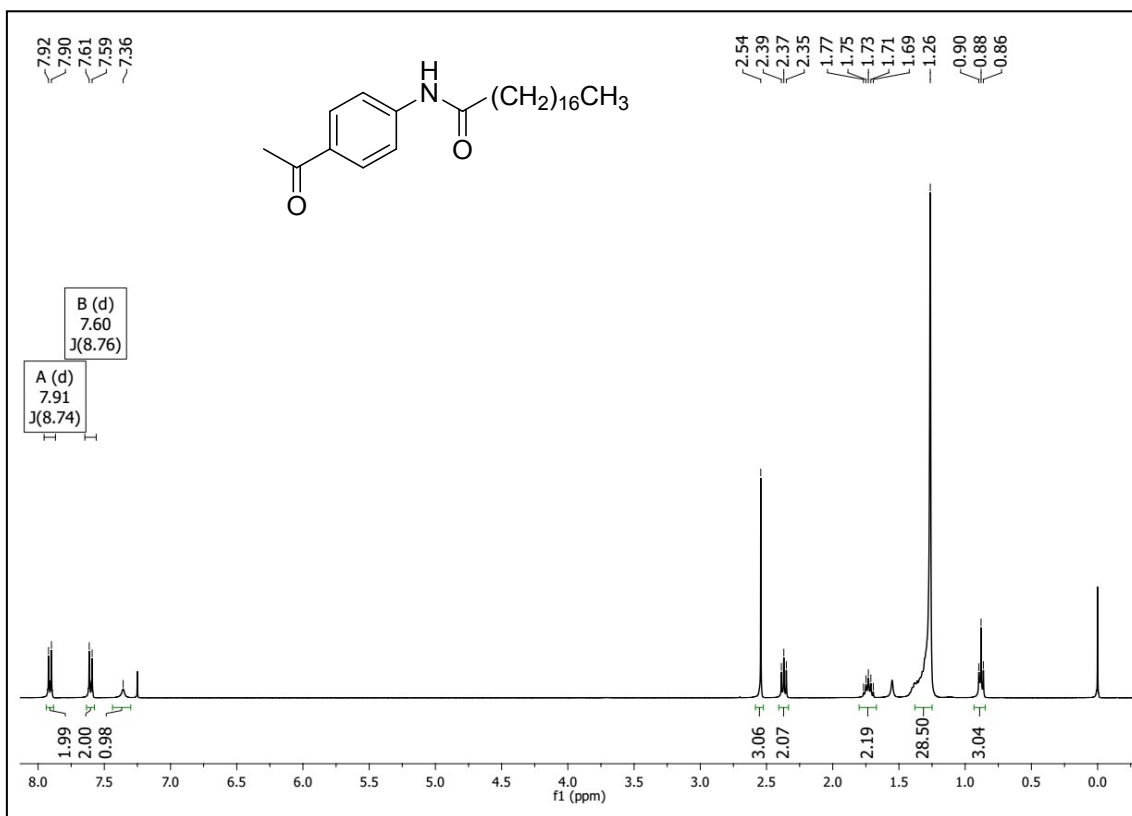

**Figure S5.** <sup>1</sup>H RMN spectra of compound **3** in CDCl<sub>3</sub>, 600.13 MHz (40°C).

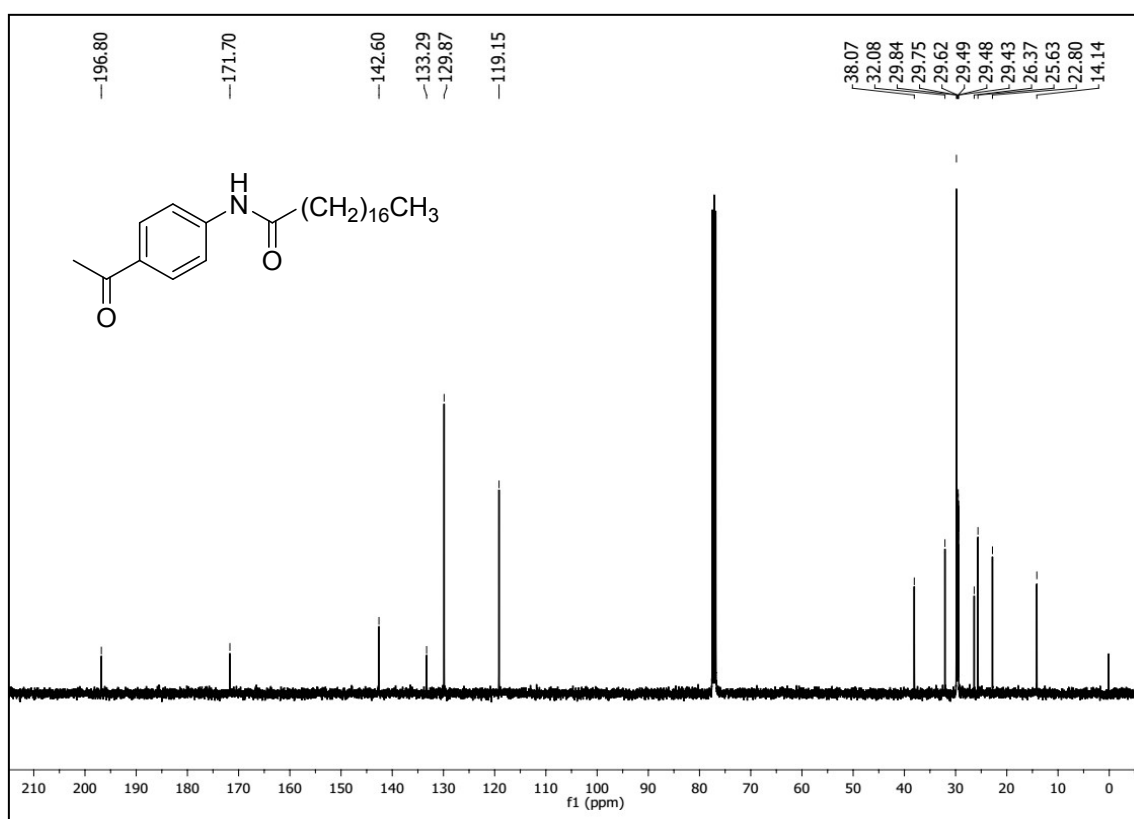

**Figure S6.** <sup>13</sup>C RMN spectra of compound **3** in CDCl<sub>3</sub>, 150.903 MHz (40°C).

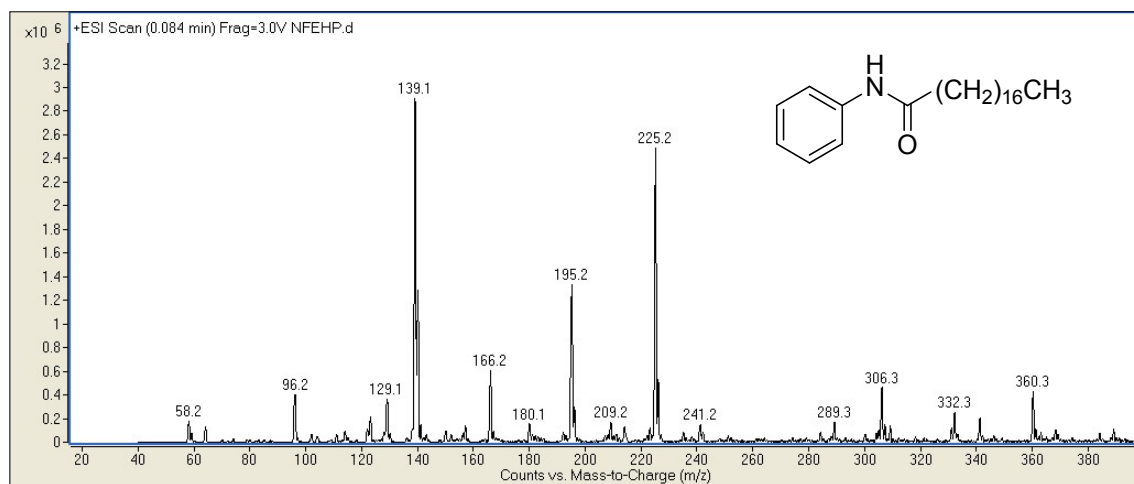

**Figure S7.** Mass spectra of compound **1** (LC-MS positive mode).

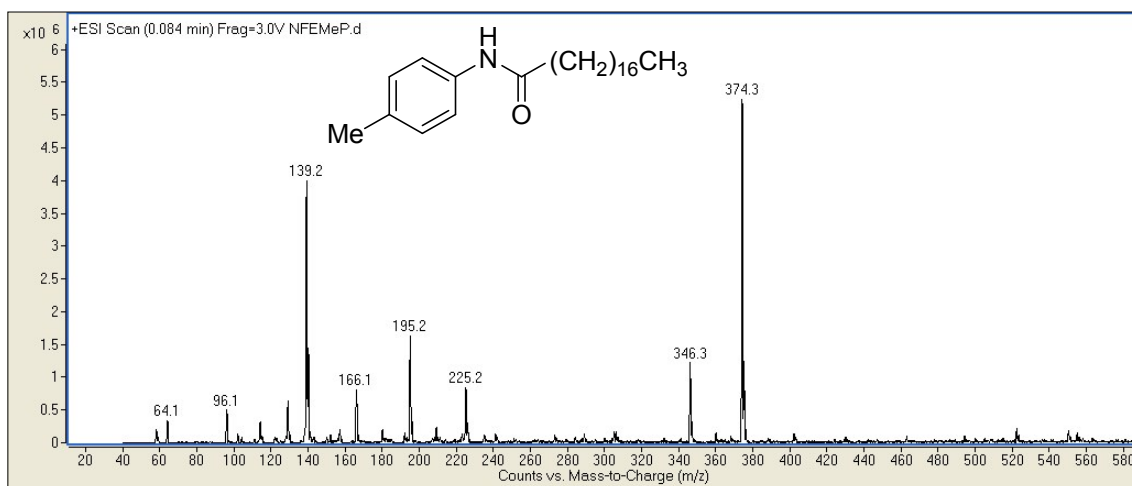

**Figure S8.** Mass spectra of compound **2** (LC-MS positive mode).

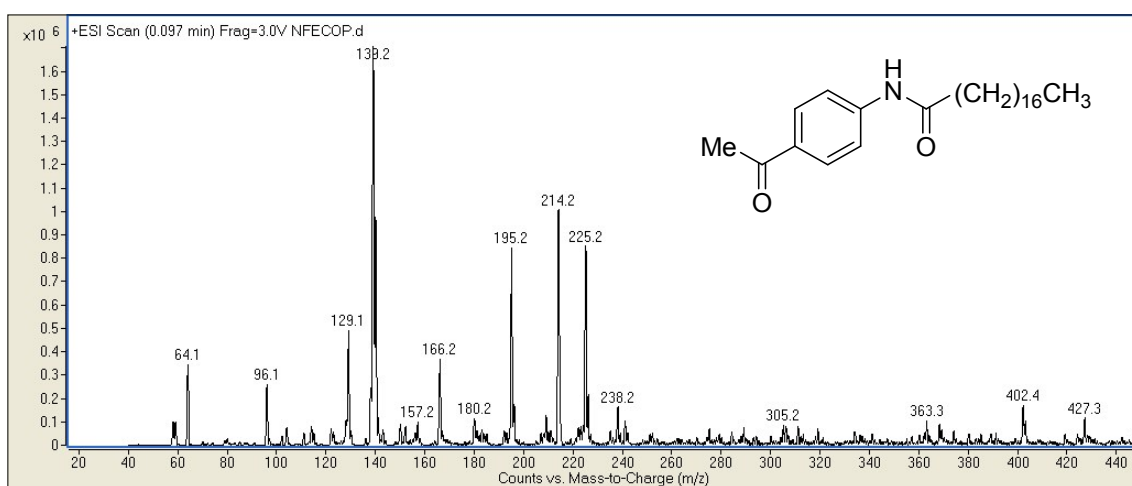

**Figure S9.** Mass spectra of compound **3** (LC-MS positive mode).

## Gelation Behavior

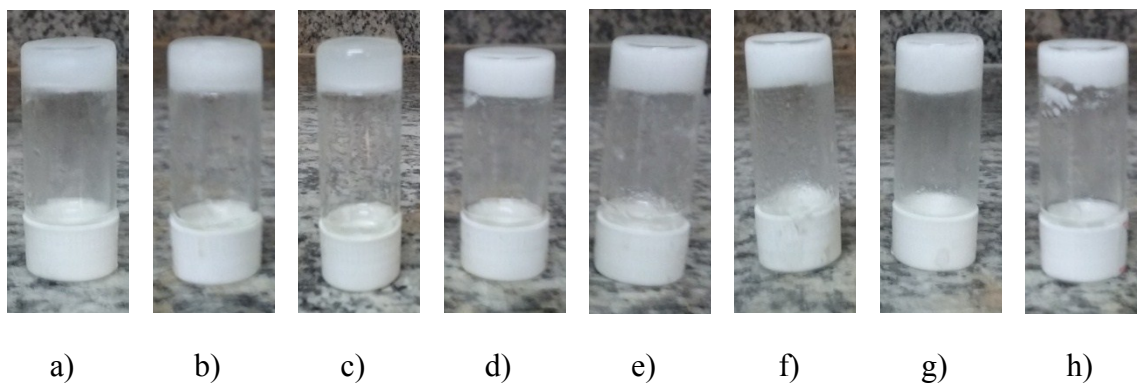

**Figure S10.** Supramolecular gel of compound **2** in: a) cyclohexane, b) benzene, c) toluene, d) ethyl acetate, e) acetonitrile f) ethanol, g) DMSO, h) acetone.

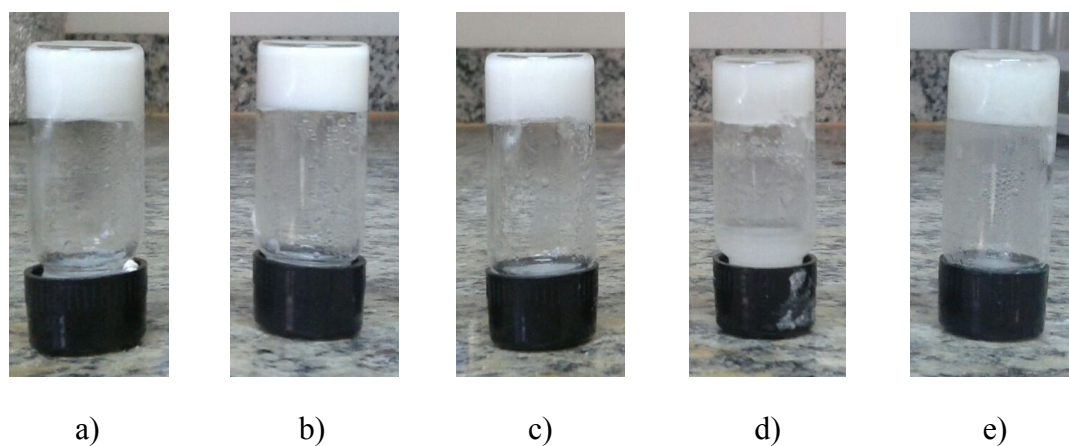

**Figure S11.** Supramolecular gel of compound **3** in: a) cyclohexane, b) benzene, c) toluene, d) acetonitrile e) DMSO.

## UV-Vis spectroscopy

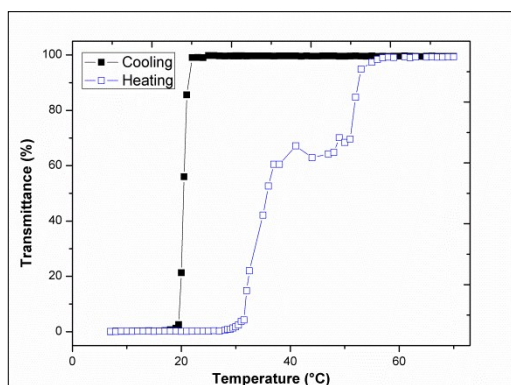

Toluene

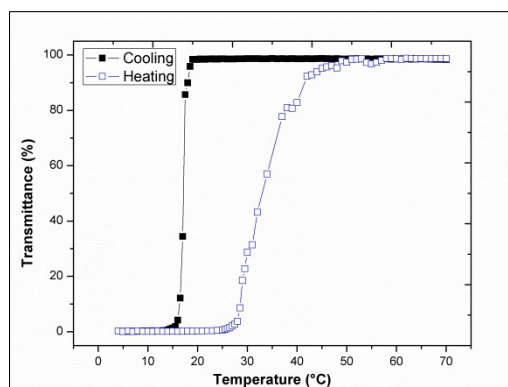

Benzene

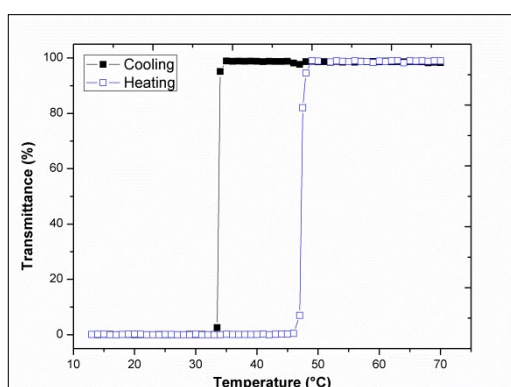

DMSO

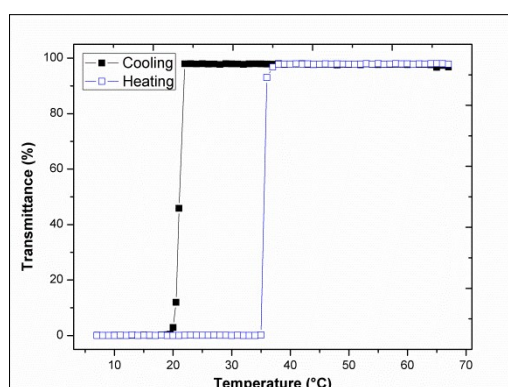

Ethanol

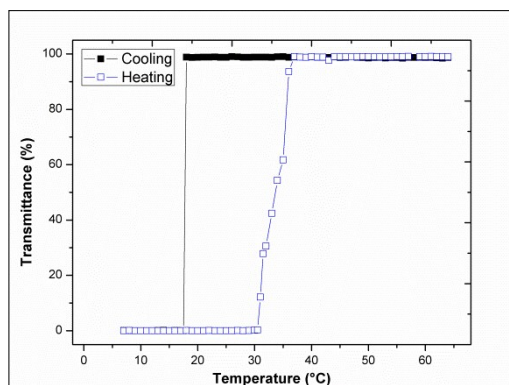

Ethyl acetate

**Figure S12.** Transmittance *versus* temperature curves of **1** in several solvents.



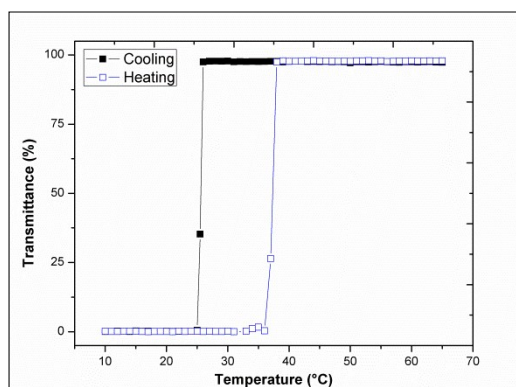

Ethyl acetate

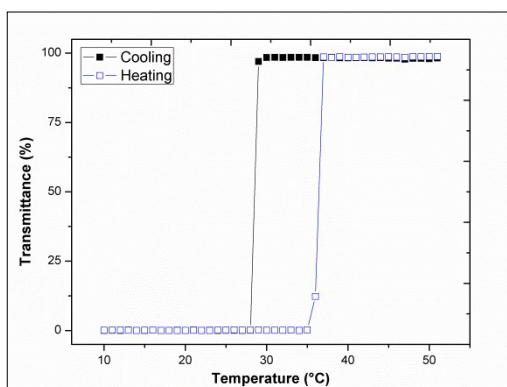

Acetone

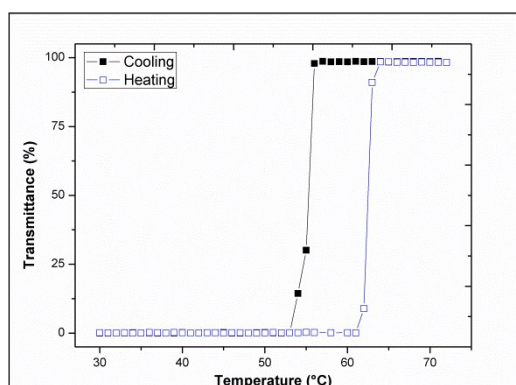

Acetonitrile

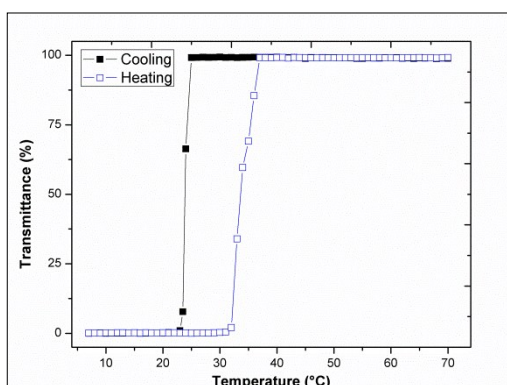

Benzene

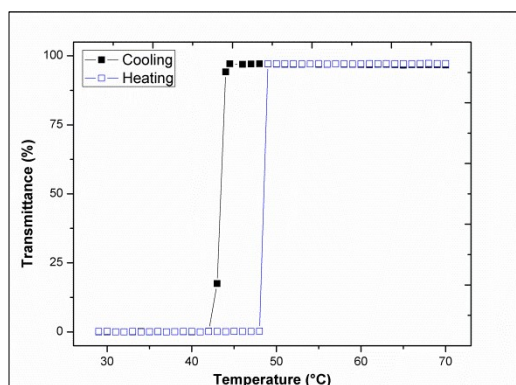

Cyclohexane

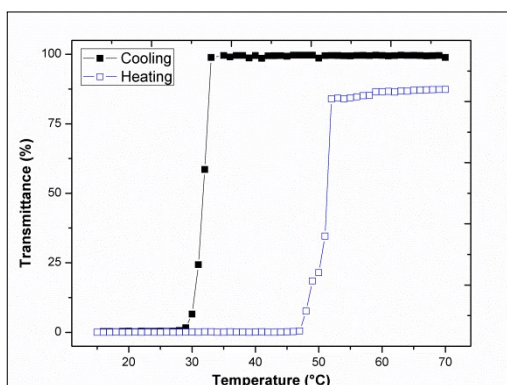

DMSO

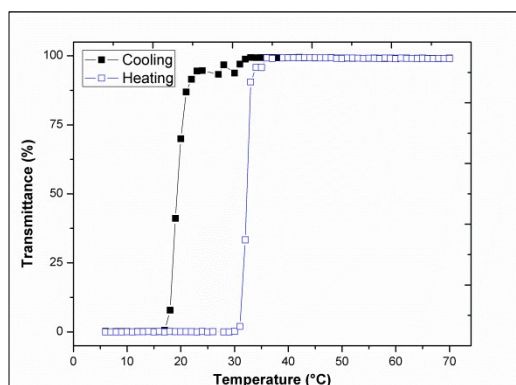

Ethanol

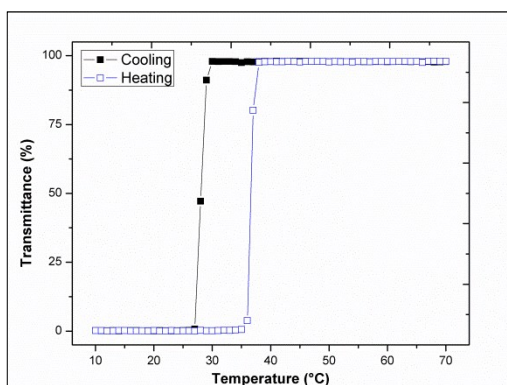

Toluene

**Figure S13.** Transmittance *versus* temperature curves of **2** in several solvents.

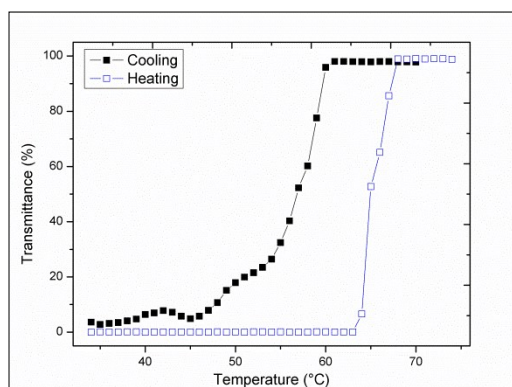

Acetonitrile

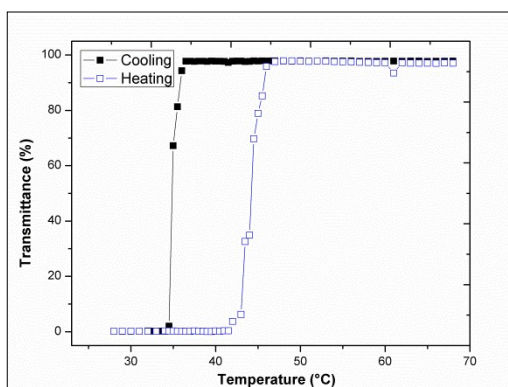

Benzene

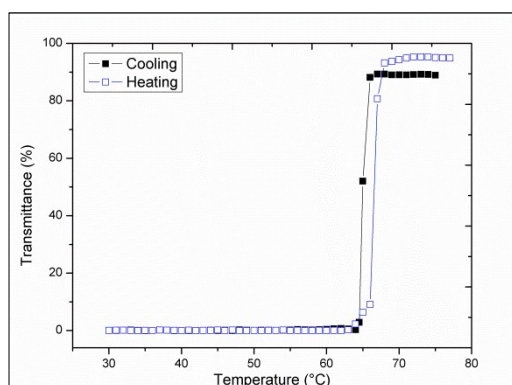

Cyclohexane

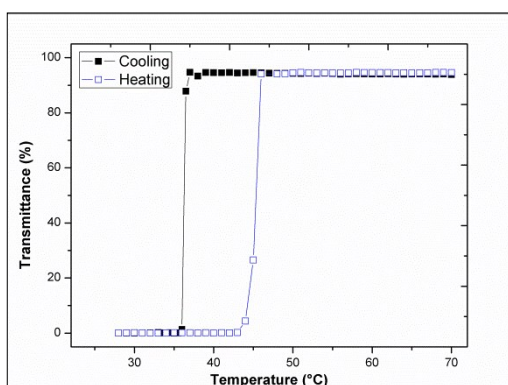

DMSO

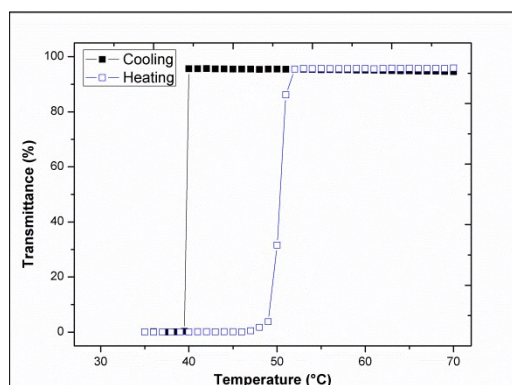

Toluene

**Figure S14.** Transmittance *versus* temperature curves of **3** in several solvents.

## DSC Curves

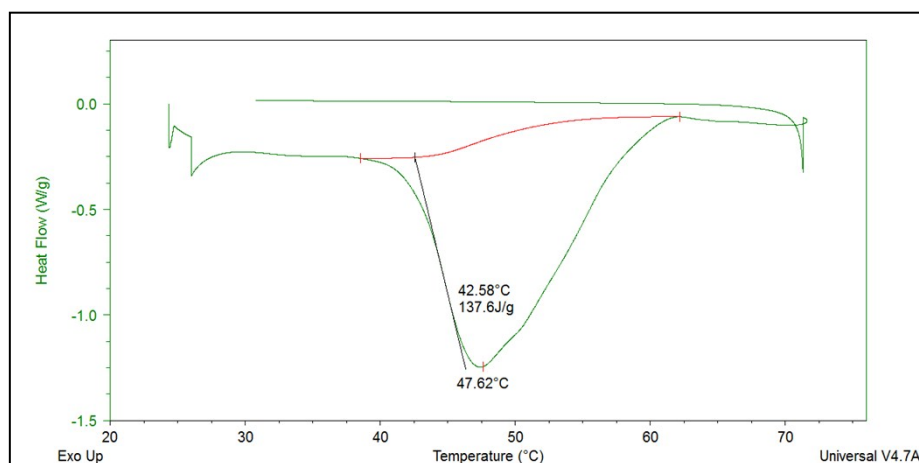

**Figure S15.** DSC curve of gel formed from **1** (R = H) in ethyl acetate at heating rate of 5 °C min<sup>-1</sup>.

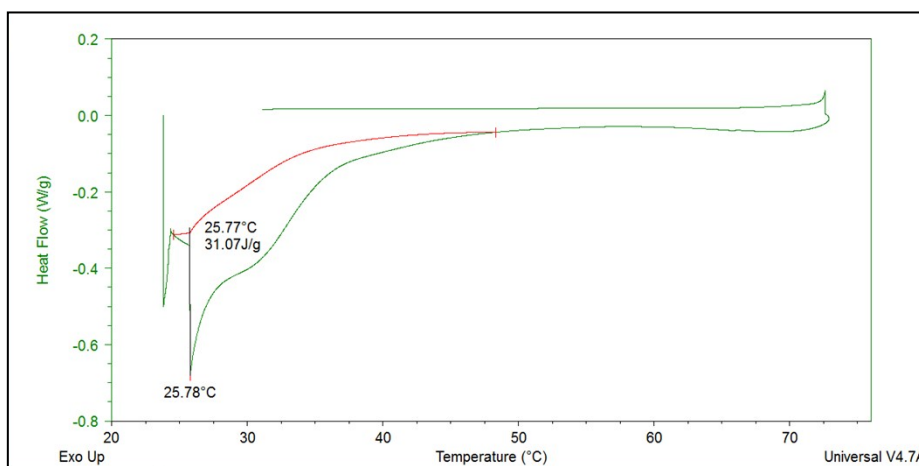

**Figure S16.** DSC curve of gel formed from **1** (R = H) in benzene at heating rate of 5 °C min<sup>-1</sup>.

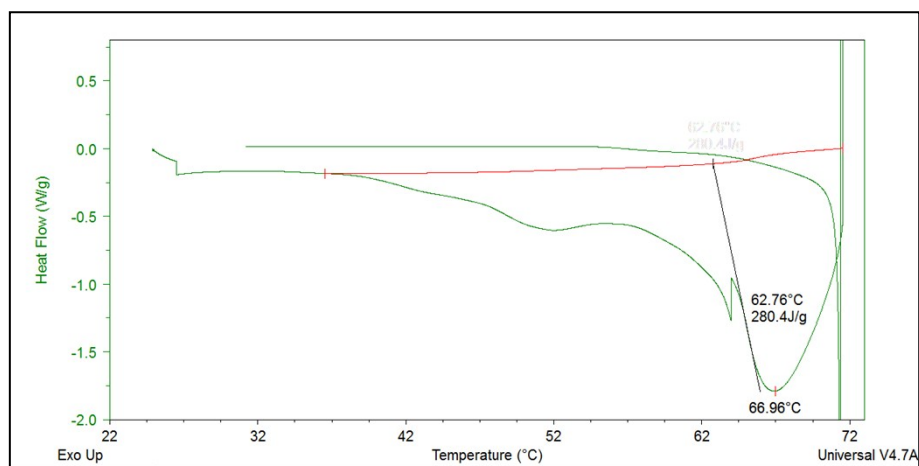

**Figure S17.** DSC curve of gel formed from **1** (R = H) in cyclohexane at heating rate of 5 °C min<sup>-1</sup>.

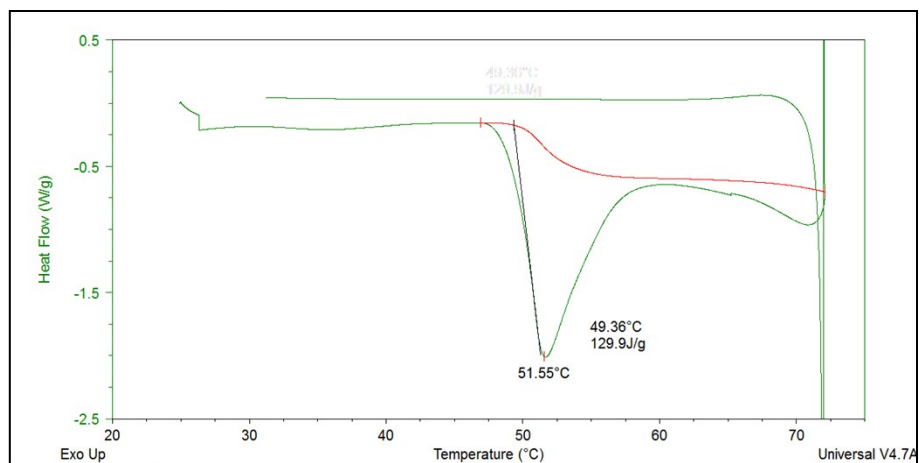

**Figure S18.** DSC curve of gel formed from **1** (R = H) in toluene at heating rate of 5 °C min<sup>-1</sup>.

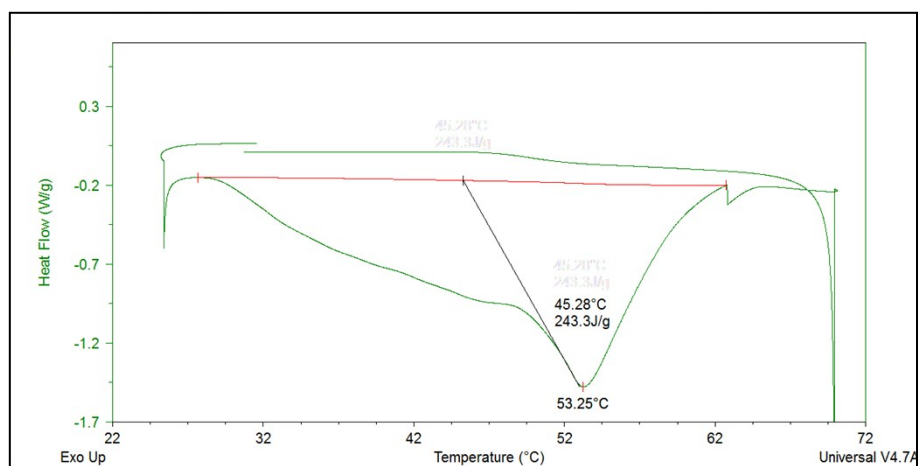

**Figure S19.** DSC curve of gel formed from **1** (R = H) in acetonitrile at heating rate of 5 °C min<sup>-1</sup>.

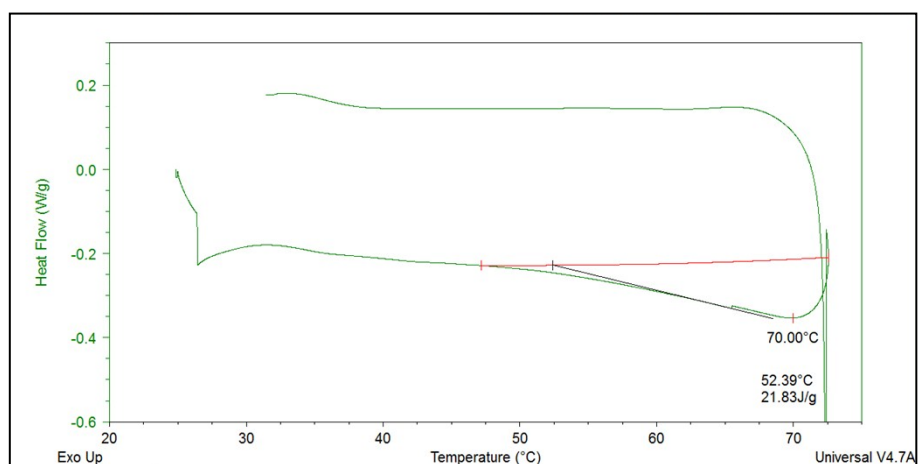

**Figure S20.** DSC curve of gel formed from **1** (R = H) in DMSO at heating rate of 5 °C min<sup>-1</sup>.

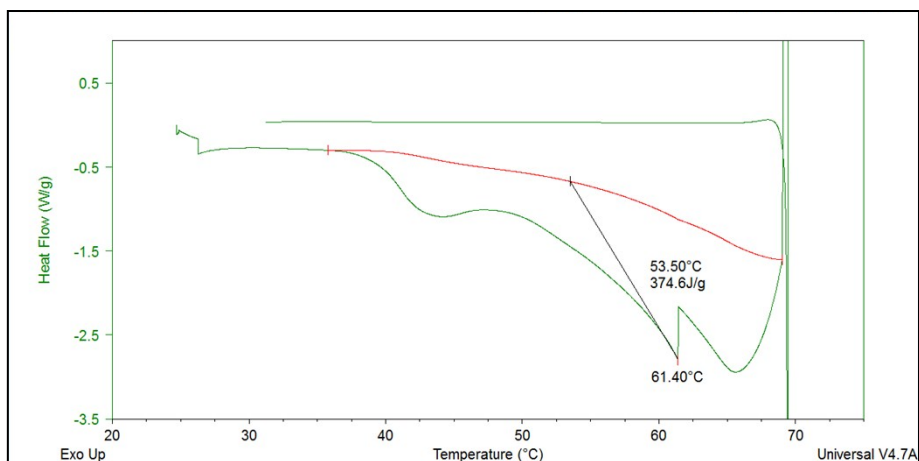

**Figure S21.** DSC curve of gel formed from **1** (R = H) in ethanol at heating rate of 5 °C min<sup>-1</sup>.

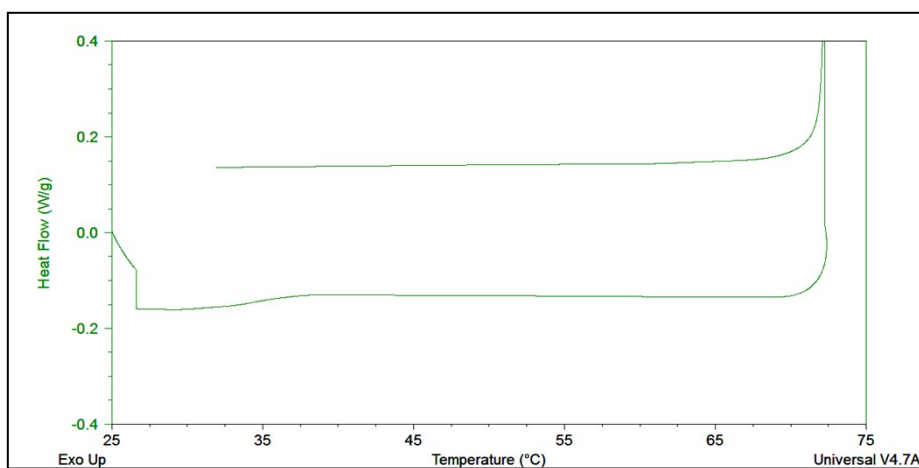

**Figure S22.** DSC curve of gel formed from **2** (R = CH<sub>3</sub>) in benzene at heating rate of 5 °C min<sup>-1</sup>.

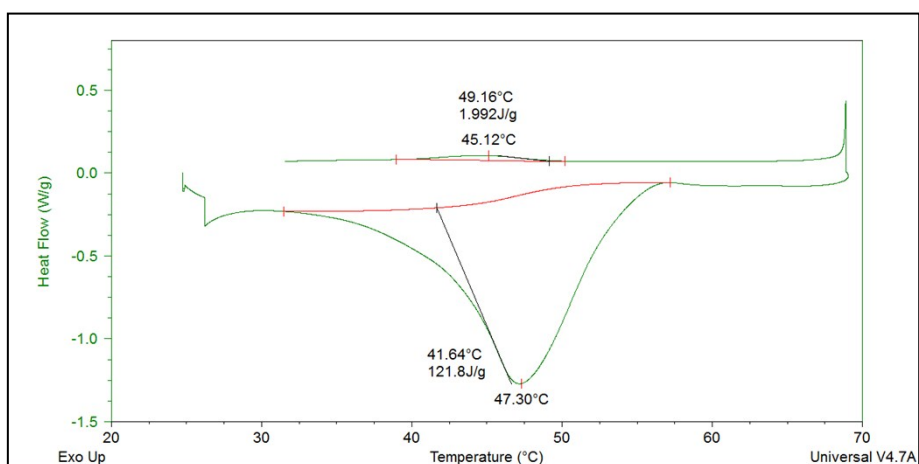

**Figure S23.** DSC curve of gel formed from **2** (R = CH<sub>3</sub>) in ethyl acetate at heating rate of 5 °C min<sup>-1</sup>.

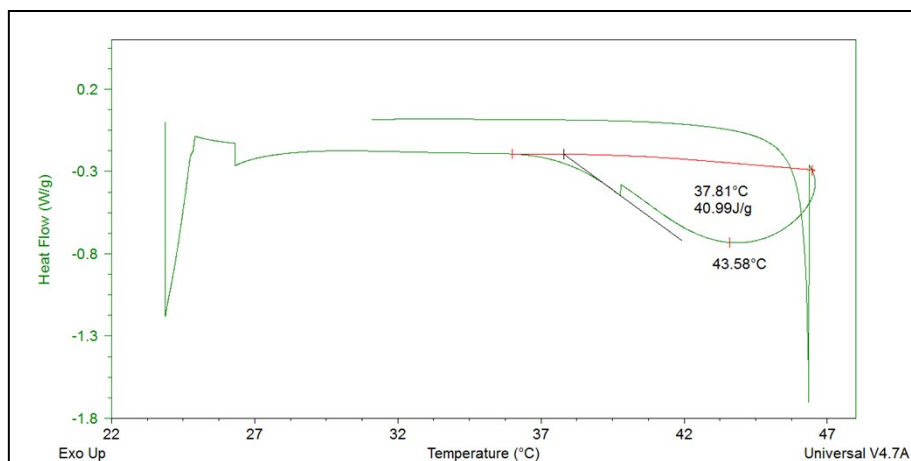

**Figure S24.** DSC curve of gel formed from **2** ( $R = \text{CH}_3$ ) in acetone at heating rate of  $5\text{ }^\circ\text{C min}^{-1}$ .

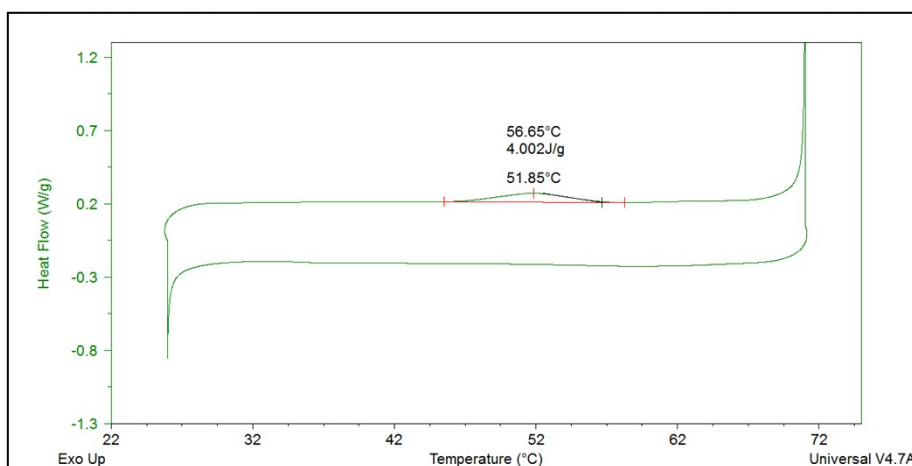

**Figure S25.** DSC curve of gel formed from **2** ( $R = \text{CH}_3$ ) in acetonitrile at heating rate of  $5\text{ }^\circ\text{C min}^{-1}$ .

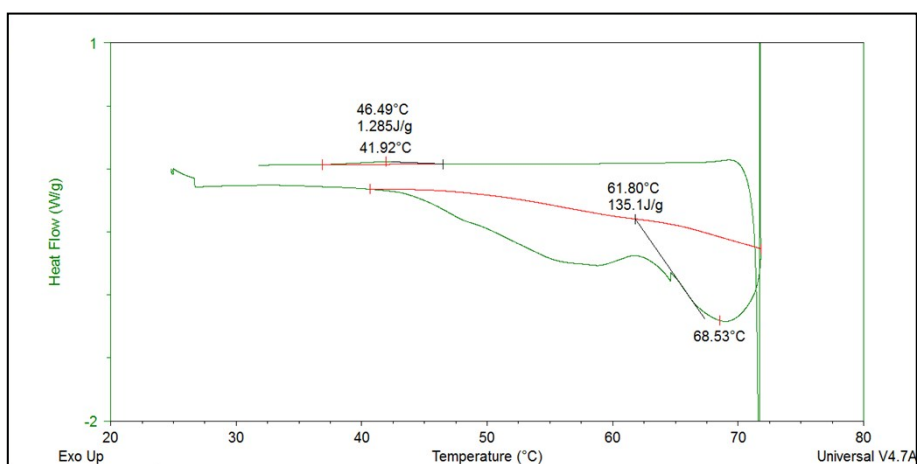

**Figure S26.** DSC curve of gel formed from **2** ( $R = \text{CH}_3$ ) in cyclohexane at heating rate of  $5\text{ }^\circ\text{C min}^{-1}$ .



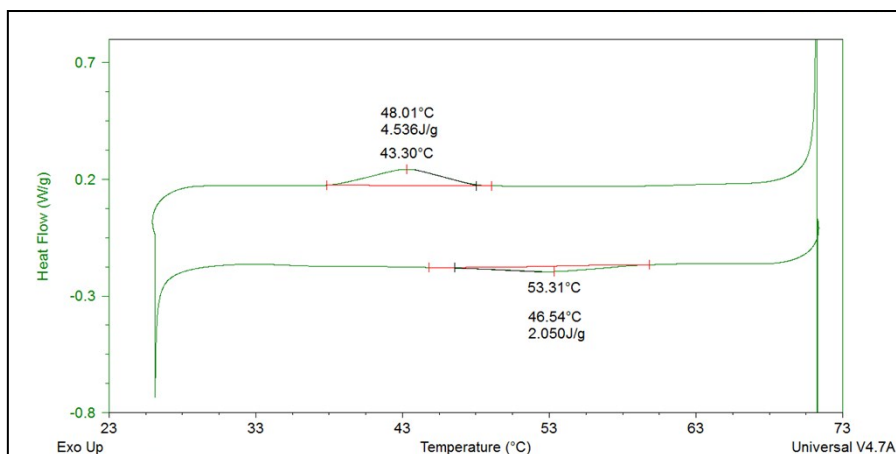

**Figure S27.** DSC curve of gel formed from **2** ( $R = \text{CH}_3$ ) in DMSO at heating rate of  $5^\circ\text{C min}^{-1}$ .

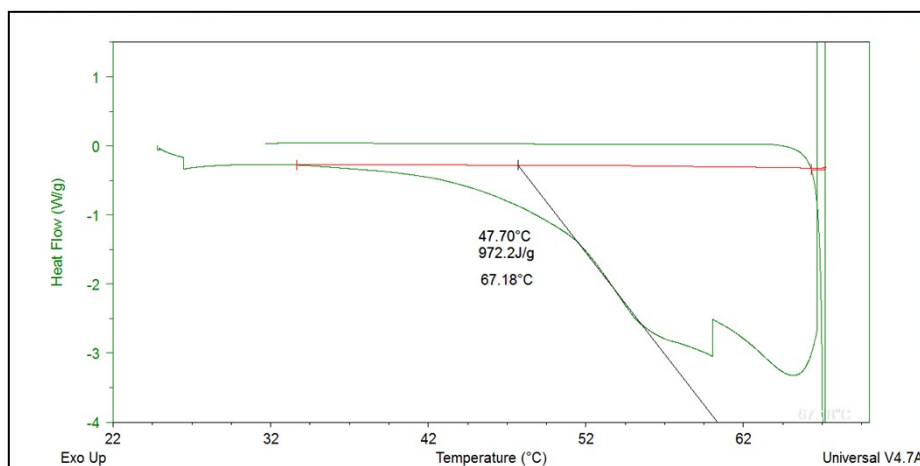

**Figure S28.** DSC curve of gel formed from **2** ( $R = \text{CH}_3$ ) in ethanol at heating rate of  $5^\circ\text{C min}^{-1}$ .

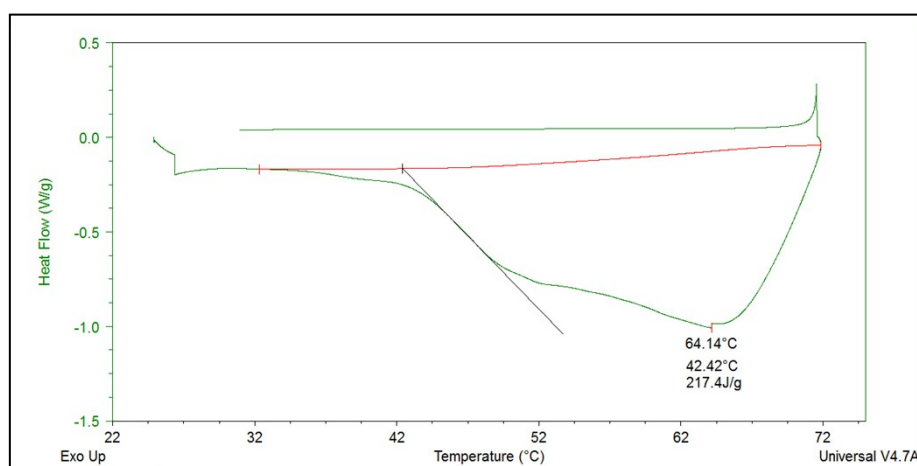

**Figure S29.** DSC curve of gel formed from **2** ( $R = \text{CH}_3$ ) in toluene at heating rate of  $5^\circ\text{C min}^{-1}$ .

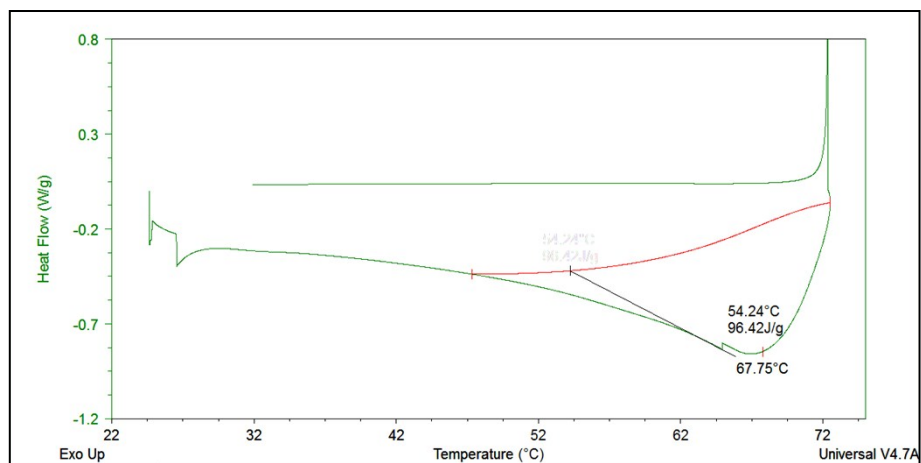

**Figure S30.** DSC curve of gel formed from **3** ( $R = \text{COCH}_3$ ) in acetonitrile at heating rate of  $5^\circ\text{C min}^{-1}$ .

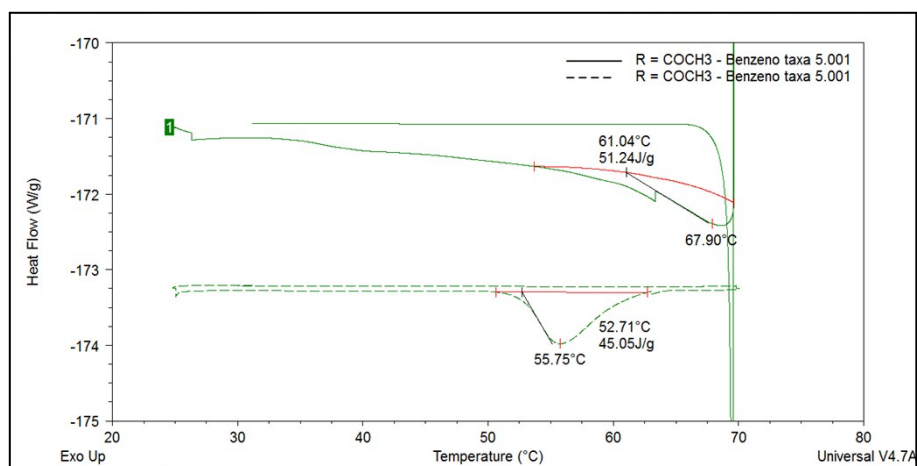

**Figure S31.** DSC curve of gel formed from **3** ( $R = \text{COCH}_3$ ) in benzene at heating rate of  $5^\circ\text{C min}^{-1}$ .

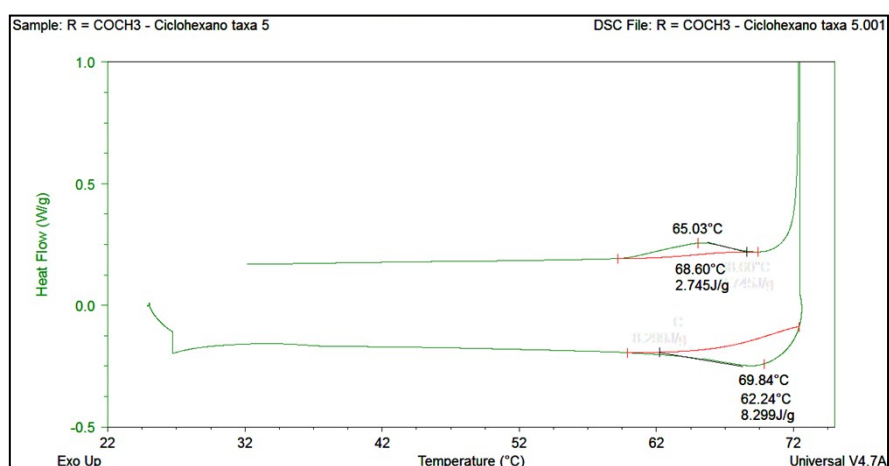

**Figure S32.** DSC curve of gel formed from **3** ( $R = \text{COCH}_3$ ) in cyclohexane at heating rate of  $5^\circ\text{C min}^{-1}$ .



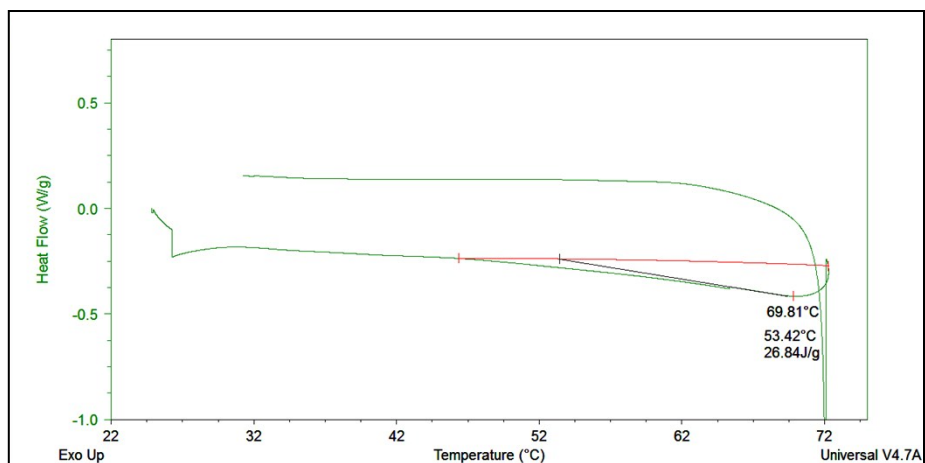

**Figure S33.** DSC curve of gel formed from **3** ( $R = \text{COCH}_3$ ) in DMSO at heating rate of  $5\text{ }^\circ\text{C min}^{-1}$ .

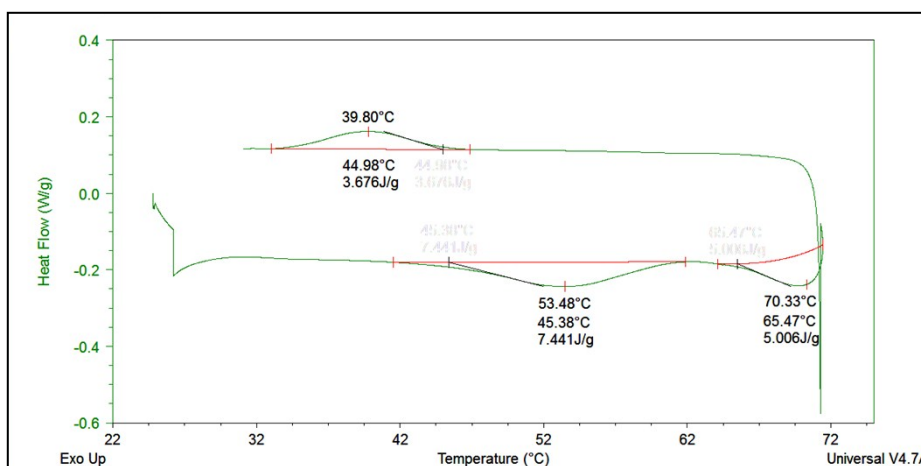

**Figure S34.** DSC curve of gel formed from **3** ( $R = \text{COCH}_3$ ) in toluene at heating rate of  $5\text{ }^\circ\text{C min}^{-1}$ .

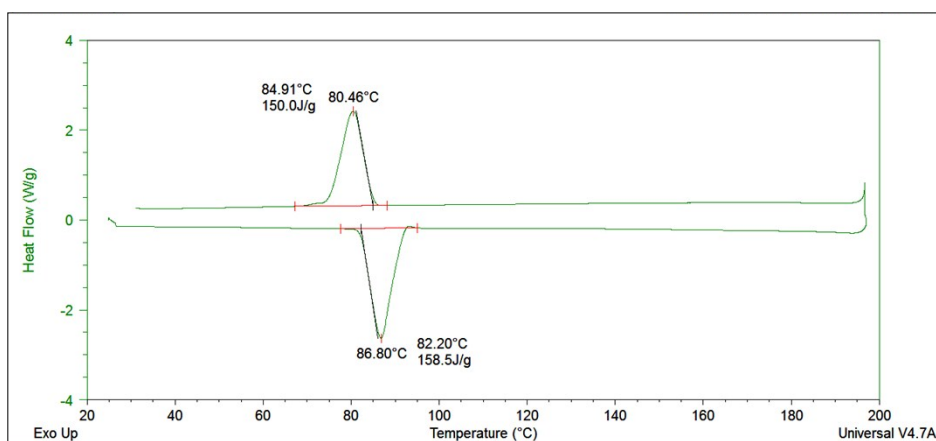

**Figure S35.** DSC curve for **1** ( $R = \text{H}$ ) in powder form at heating rate of  $5\text{ }^\circ\text{C min}^{-1}$ .

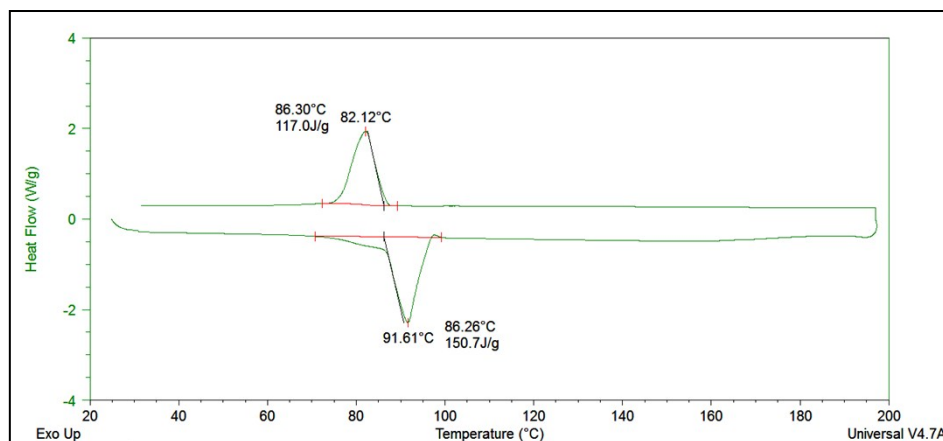

**Figure S36.** DSC curve for **2** (R = CH<sub>3</sub>) in powder form at heating rate of 5 °C min<sup>-1</sup>.

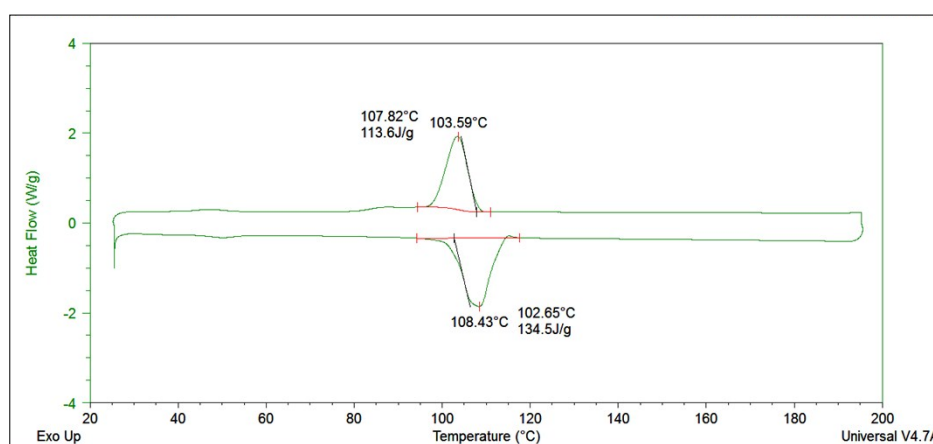

**Figure S37.** DSC curve for **3** (R = COCH<sub>3</sub>) in powder form at heating rate of 5 °C min<sup>-1</sup>.

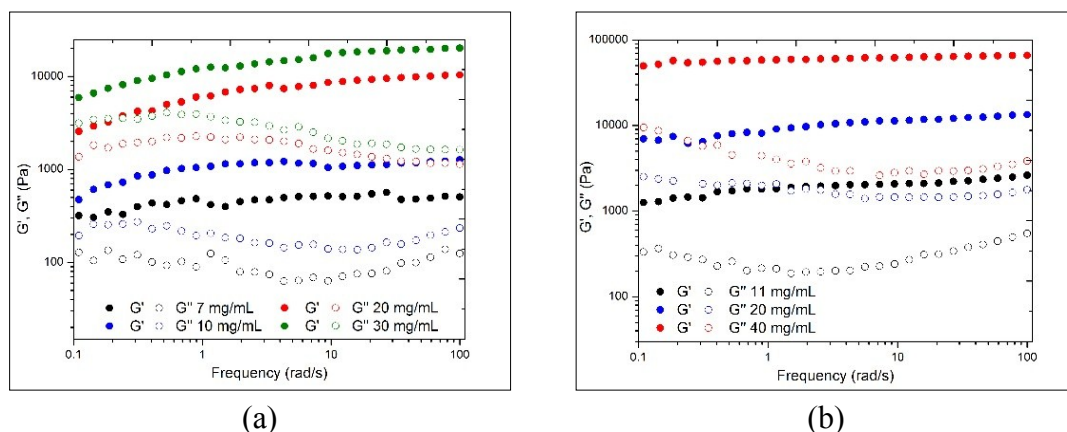

**Figure S38.** Frequency sweeps (strain 0.02%) for gel of (a) **2** and (b) **3** formed in cyclohexane at different concentrations at 25 °C.  $G'$ , Closed symbols and  $G''$ , open symbols.

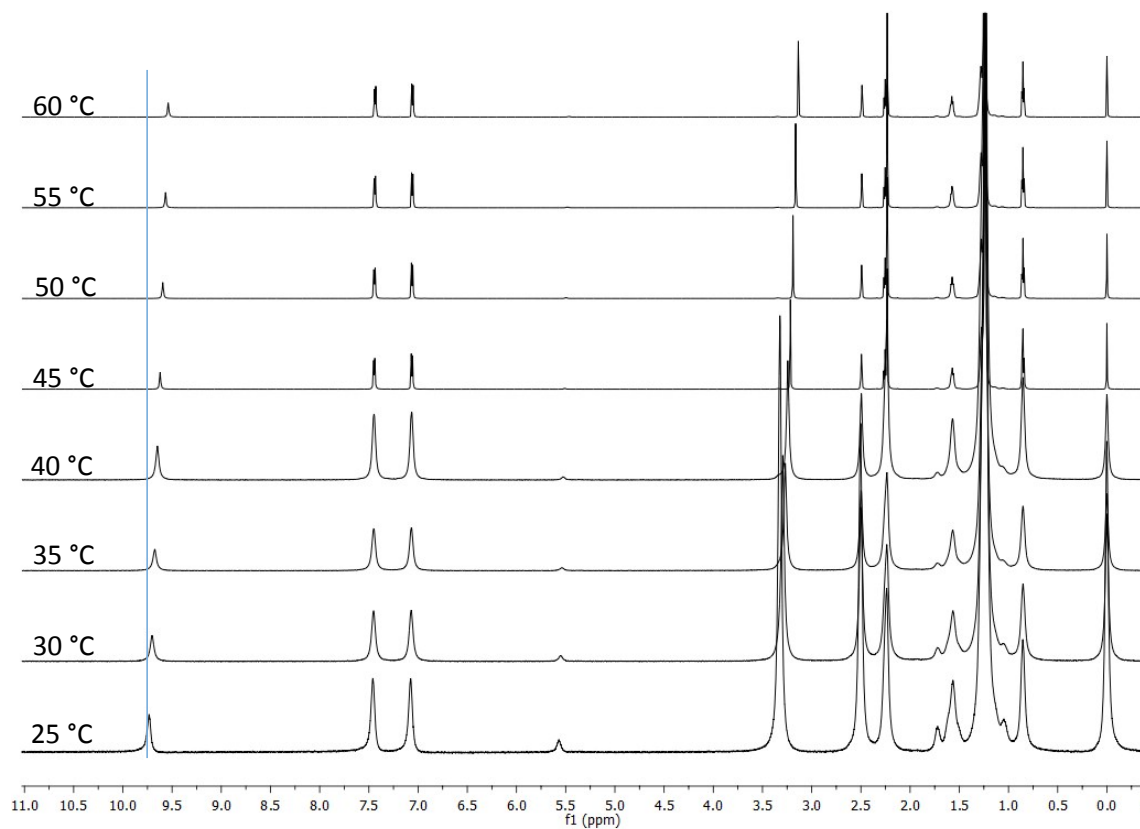

**Figure S39.** Superposition NMR  $^1\text{H}$  spectra of compound **2** recorded in  $\text{DMSO-}d_6$  solvent at different temperatures at concentration of  $20 \text{ mg mL}^{-1}$ .

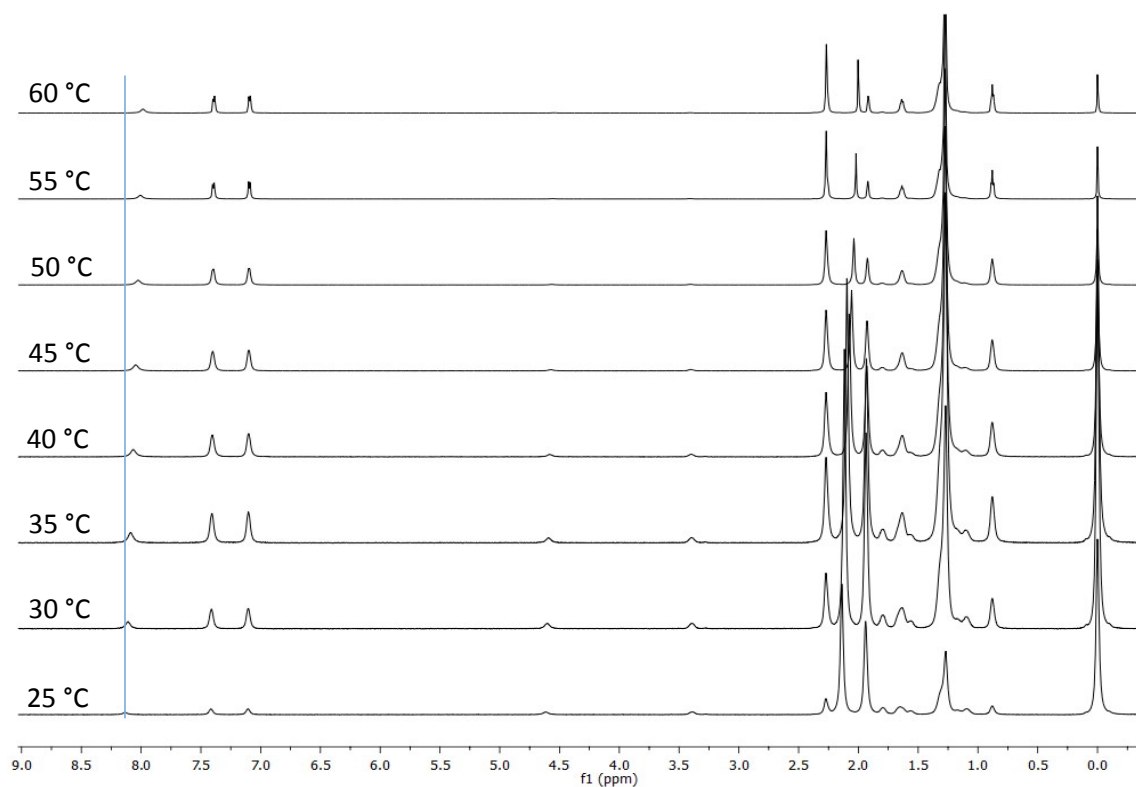

**Figure S40.** Superposition NMR  $^1\text{H}$  spectra of compound **2** recorded in  $\text{acetonitrile-}d_3$  solvent at different temperatures at concentration of  $20 \text{ mg mL}^{-1}$ .

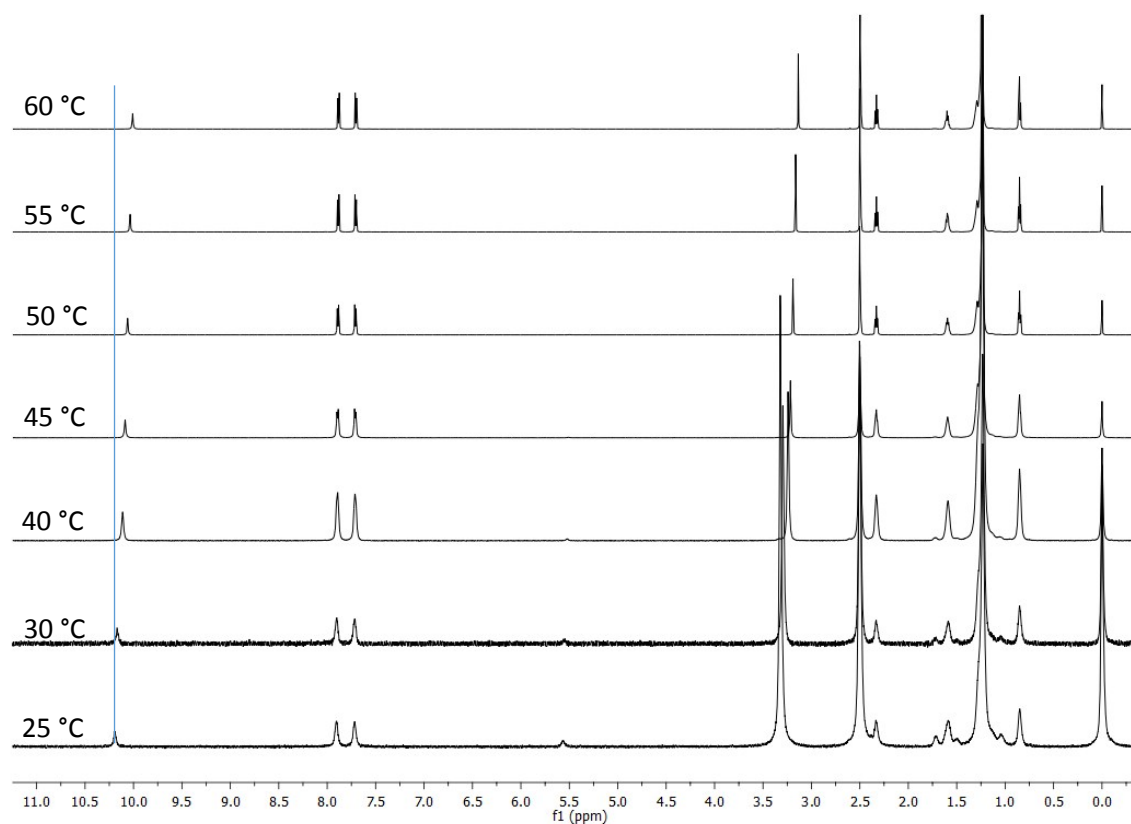

**Figure S41.** Superposition NMR  $^1\text{H}$  spectra of compound **3** recorded in  $\text{DMSO-}d_6$  solvent at different temperatures at concentration of  $20 \text{ mg mL}^{-1}$ .

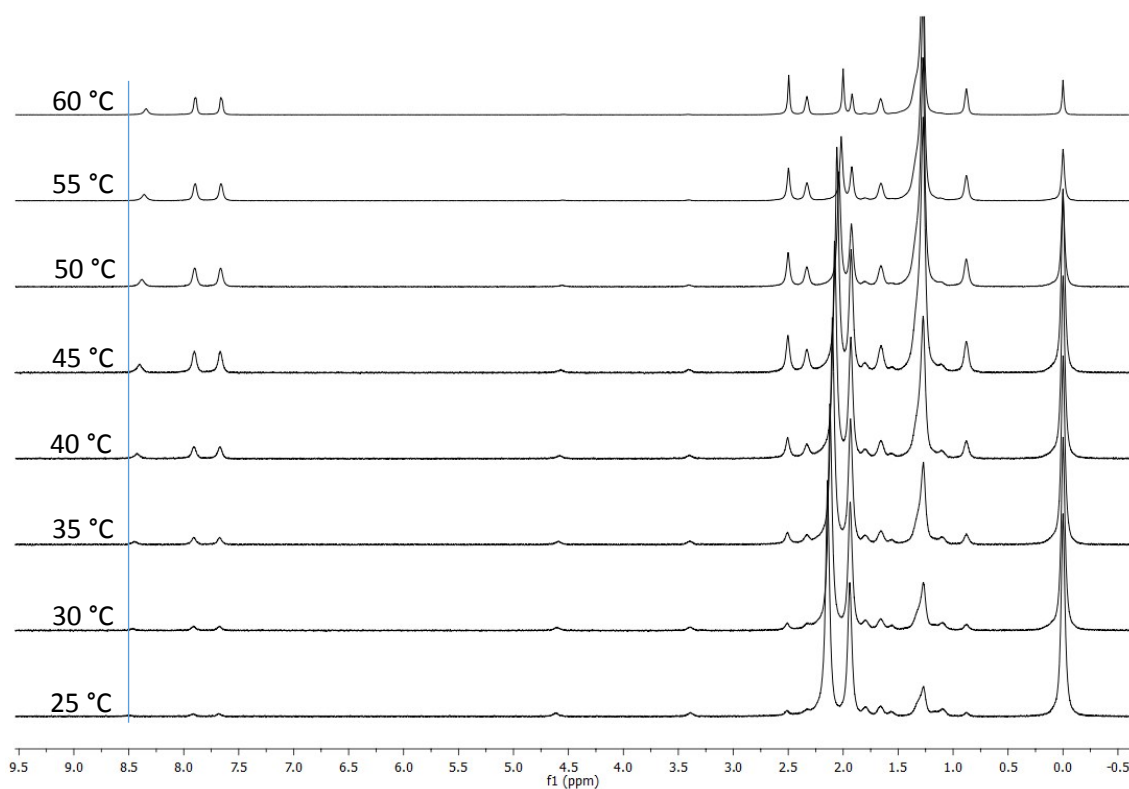

**Figure S42.** Superposition NMR  $^1\text{H}$  spectra of compound **3** recorded in acetonitrile- $d_3$  solvent at different temperatures at concentration of  $20 \text{ mg mL}^{-1}$ .

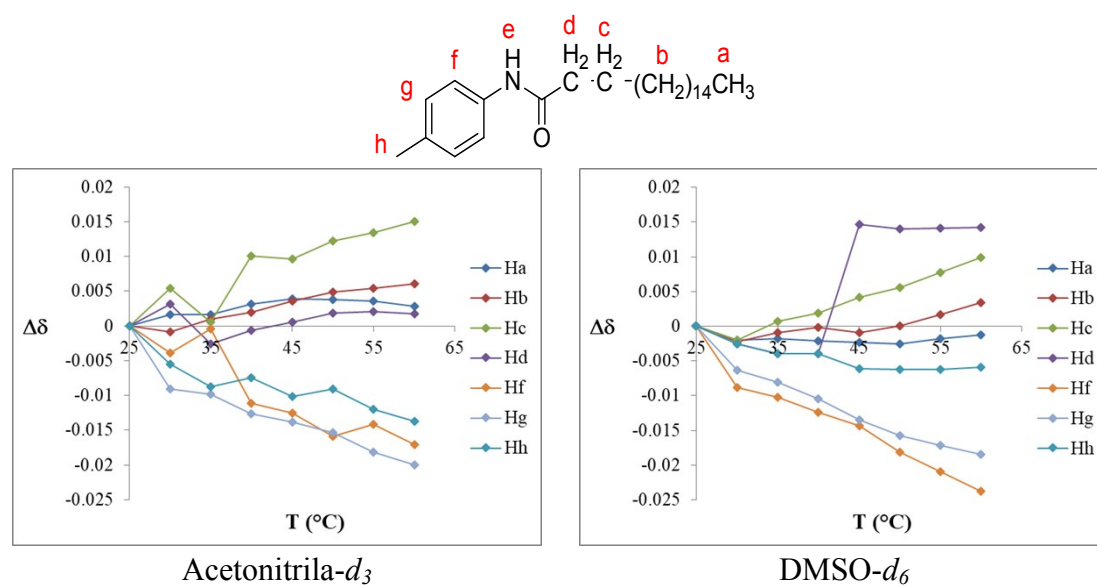

**Figure S43.**  $^1\text{H}$  NMR chemical shift changes of signals of compound **2** with temperature.

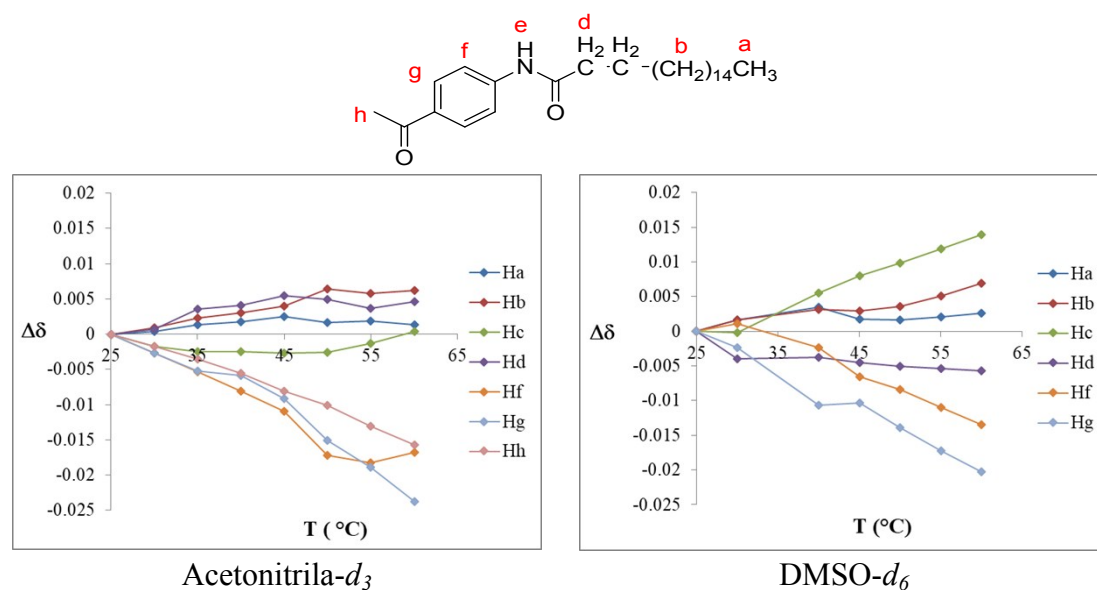

**Figure S44.**  $^1\text{H}$  NMR chemical shift changes of signals of compound **3** with temperature.

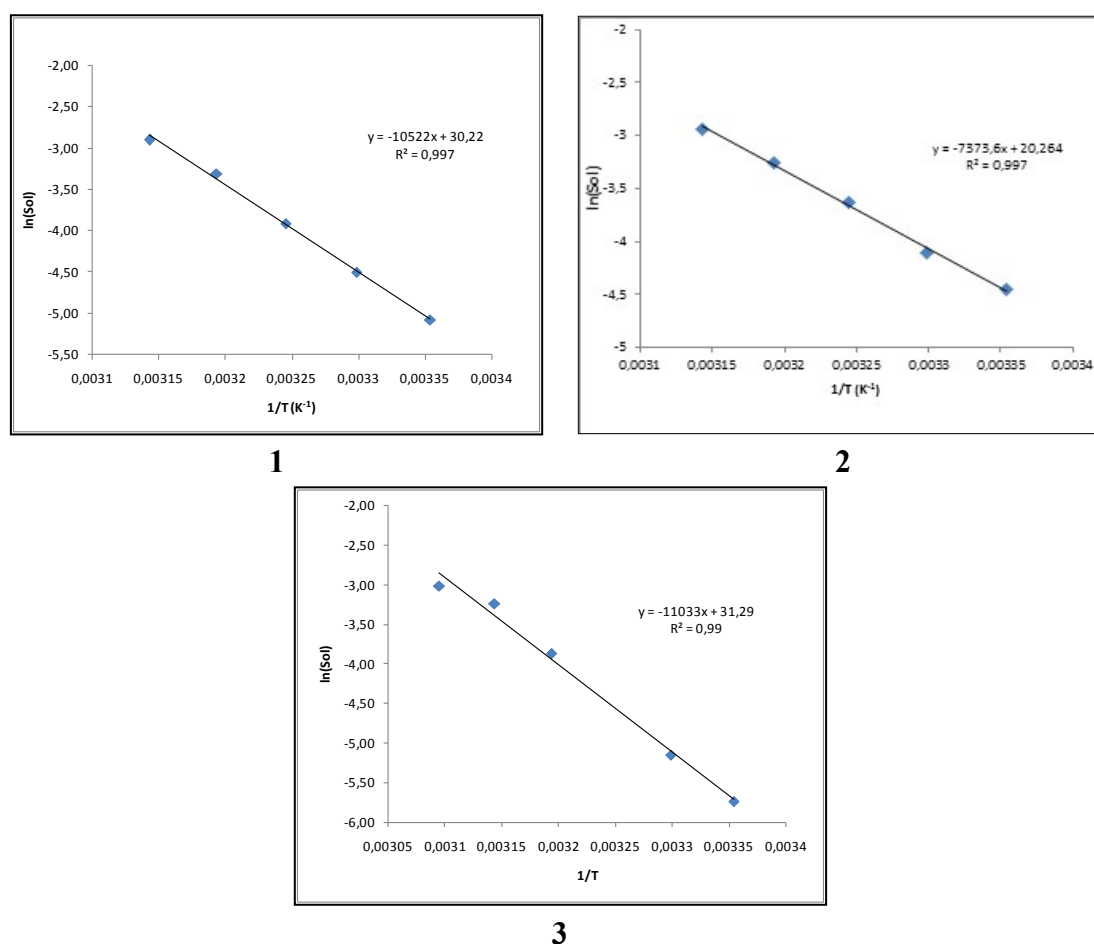

**Figure S45.** Plot of  $\text{Ln}(\text{Sol})$  (Sol = solubility, i.e., the concentration of gelator molecules in solution) against the reciprocal of the dissolution temperature for compound **1-3** in DMSO- $d_6$ .

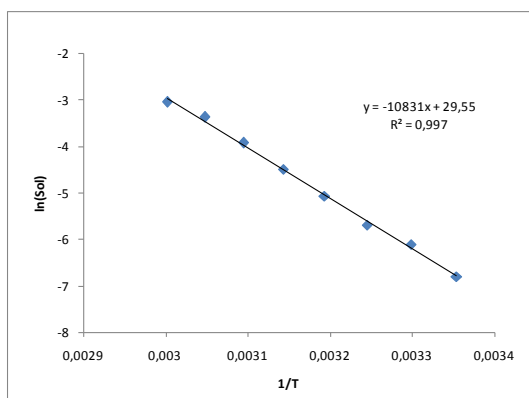

1

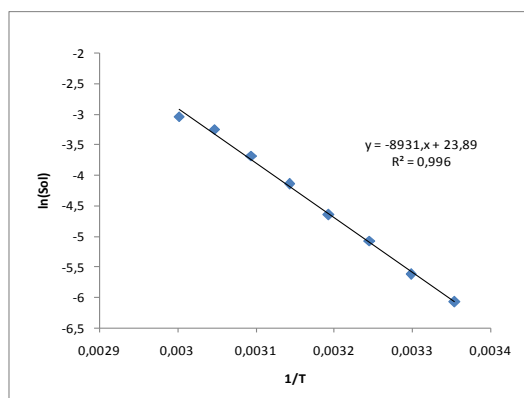

2

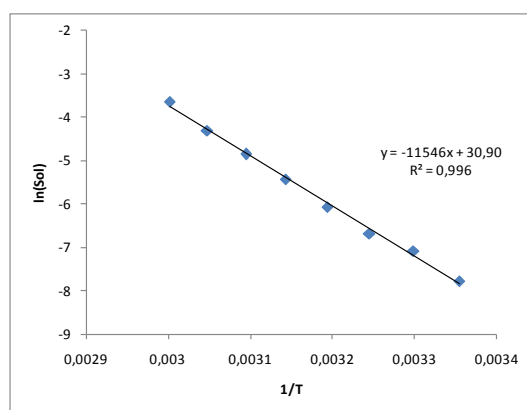

3

**Figure S46.** Plot of  $\ln(\text{Sol})$  (Sol = solubility, i.e., the concentration of gelator molecules in solution) against the reciprocal of the dissolution temperature for compound **1-3** in acetonitrile- $d_6$ .
